# Supplementary material for: Mycobacterium tuberculosis releases an antacid that remodels phagosomes
Source: Springer Nature journal article supplement (doi:10.1038/s41589-019-0336-0), 2019-08-19
Supplement: 41589_2019_336_MOESM39_ESM.mol [file 41589_2019_336_MOESM39_ESM.mol]

nchembio.A181208768B-comp13.mol
  ChemDraw06181910472D

 52 51  0  0  1  0  0  0  0  0999 V2000
   -0.6039   -2.0625    0.0000 O   0  0  0  0  0  0  0  0  0  0  0  0
   -1.4289   -2.0625    0.0000 P   0  0  0  0  0  0  0  0  0  0  0  0
   -1.4289   -2.8875    0.0000 O   0  5  0  0  0  0  0  0  0  0  0  0
   -1.4289   -1.2375    0.0000 O   0  0  0  0  0  0  0  0  0  0  0  0
   -2.1434   -0.8250    0.0000 C   0  0  0  0  0  0  0  0  0  0  0  0
   -2.1434    0.0000    0.0000 C   0  0  0  0  0  0  0  0  0  0  0  0
   -1.4289    0.4125    0.0000 O   0  0  0  0  0  0  0  0  0  0  0  0
   -0.7145    0.0000    0.0000 C   0  0  0  0  0  0  0  0  0  0  0  0
    0.0000    0.4125    0.0000 C   0  0  0  0  0  0  0  0  0  0  0  0
    0.7145    0.0000    0.0000 C   0  0  0  0  0  0  0  0  0  0  0  0
    1.4289    0.4125    0.0000 C   0  0  0  0  0  0  0  0  0  0  0  0
    2.1434    0.0000    0.0000 C   0  0  0  0  0  0  0  0  0  0  0  0
    2.8579    0.4125    0.0000 C   0  0  0  0  0  0  0  0  0  0  0  0
    3.5724    0.0000    0.0000 C   0  0  0  0  0  0  0  0  0  0  0  0
    4.2868    0.4125    0.0000 C   0  0  0  0  0  0  0  0  0  0  0  0
    5.0013    0.0000    0.0000 C   0  0  0  0  0  0  0  0  0  0  0  0
    5.0013   -0.8250    0.0000 C   0  0  0  0  0  0  0  0  0  0  0  0
    4.2868   -1.2375    0.0000 C   0  0  0  0  0  0  0  0  0  0  0  0
    3.5724   -0.8250    0.0000 C   0  0  0  0  0  0  0  0  0  0  0  0
    2.8579   -1.2375    0.0000 C   0  0  0  0  0  0  0  0  0  0  0  0
    2.1434   -0.8250    0.0000 C   0  0  0  0  0  0  0  0  0  0  0  0
    1.4289   -1.2375    0.0000 C   0  0  0  0  0  0  0  0  0  0  0  0
    0.7145   -0.8250    0.0000 C   0  0  0  0  0  0  0  0  0  0  0  0
   -0.7145   -0.8250    0.0000 O   0  0  0  0  0  0  0  0  0  0  0  0
   -2.8579    0.4125    0.0000 C   0  0  0  0  0  0  0  0  0  0  0  0
   -3.5724    0.0000    0.0000 O   0  0  0  0  0  0  0  0  0  0  0  0
   -4.2868    0.4125    0.0000 C   0  0  0  0  0  0  0  0  0  0  0  0
   -4.2868    1.2375    0.0000 C   0  0  0  0  0  0  0  0  0  0  0  0
   -3.5724    1.6500    0.0000 C   0  0  0  0  0  0  0  0  0  0  0  0
   -2.8579    1.2375    0.0000 C   0  0  0  0  0  0  0  0  0  0  0  0
   -2.1434    1.6500    0.0000 C   0  0  0  0  0  0  0  0  0  0  0  0
   -1.4289    1.2375    0.0000 C   0  0  0  0  0  0  0  0  0  0  0  0
   -0.7145    1.6500    0.0000 C   0  0  0  0  0  0  0  0  0  0  0  0
    0.0000    1.2375    0.0000 C   0  0  0  0  0  0  0  0  0  0  0  0
    0.7145    1.6500    0.0000 C   0  0  0  0  0  0  0  0  0  0  0  0
    0.7145    2.4750    0.0000 C   0  0  0  0  0  0  0  0  0  0  0  0
    0.0000    2.8875    0.0000 C   0  0  0  0  0  0  0  0  0  0  0  0
   -0.7145    2.4750    0.0000 C   0  0  0  0  0  0  0  0  0  0  0  0
   -1.4289    2.8875    0.0000 C   0  0  0  0  0  0  0  0  0  0  0  0
   -2.1434    2.4750    0.0000 C   0  0  0  0  0  0  0  0  0  0  0  0
   -2.8579    2.8875    0.0000 C   0  0  0  0  0  0  0  0  0  0  0  0
   -3.5724    2.4750    0.0000 C   0  0  0  0  0  0  0  0  0  0  0  0
   -4.2868    2.8875    0.0000 C   0  0  0  0  0  0  0  0  0  0  0  0
   -5.0013    0.0000    0.0000 O   0  0  0  0  0  0  0  0  0  0  0  0
   -2.3153   -2.0453    0.0000 O   0  0  0  0  0  0  0  0  0  0  0  0
   -2.7295   -2.7587    0.0000 C   0  0  0  0  0  0  0  0  0  0  0  0
   -3.5545   -2.7567    0.0000 C   0  0  0  0  0  0  0  0  0  0  0  0
   -3.9653   -2.0413    0.0000 N   0  3  0  0  0  0  0  0  0  0  0  0
   -4.3761   -1.3258    0.0000 C   0  0  0  0  0  0  0  0  0  0  0  0
   -3.5511   -1.3278    0.0000 C   0  0  0  0  0  0  0  0  0  0  0  0
   -4.7903   -2.0392    0.0000 C   0  0  0  0  0  0  0  0  0  0  0  0
   -5.0013    2.4750    0.0000 C   0  0  0  0  0  0  0  0  0  0  0  0
  1  2  2  0      
  2  3  1  0      
  2 45  1  0      
  2  4  1  0      
  4  5  1  0      
  5  6  1  0      
  6  7  1  1      
  7  8  1  0      
  8  9  1  0      
  9 10  1  0      
 10 11  1  0      
 11 12  1  0      
 12 13  1  0      
 13 14  1  0      
 14 15  1  0      
 15 16  1  0      
 16 17  1  0      
 17 18  1  0      
 18 19  1  0      
 19 20  1  0      
 20 21  1  0      
 21 22  1  0      
 22 23  1  0      
  8 24  2  0      
  6 25  1  0      
 25 26  1  0      
 26 27  1  0      
 27 28  1  0      
 28 29  1  0      
 29 30  1  0      
 30 31  1  0      
 31 32  1  0      
 32 33  1  0      
 33 34  1  0      
 34 35  1  0      
 35 36  2  0      
 36 37  1  0      
 37 38  1  0      
 38 39  1  0      
 39 40  1  0      
 40 41  1  0      
 41 42  1  0      
 42 43  1  0      
 27 44  2  0      
 45 46  1  0      
 46 47  1  0      
 47 48  1  0      
 48 49  1  0      
 48 50  1  0      
 48 51  1  0      
 43 52  1  0      
M  CHG  2   3  -1  48   1
M  END
