# Supplementary material for: Mycobacterium tuberculosis releases an antacid that remodels phagosomes
Source: Springer Nature journal article supplement (doi:10.1038/s41589-019-0336-0), 2019-08-19
Supplement: 41589_2019_336_MOESM41_ESM.mol [file 41589_2019_336_MOESM41_ESM.mol]

nchembio.A181208768B-comp14.mol
  ChemDraw06181910472D

 22 23  0  0  1  0  0  0  0  0999 V2000
   -2.8693   -0.4719    0.0000 C   0  0  0  0  0  0  0  0  0  0  0  0
   -2.4451    0.2357    0.0000 C   0  0  0  0  0  0  0  0  0  0  0  0
   -3.2699    0.2493    0.0000 C   0  0  0  0  0  0  0  0  0  0  0  0
   -2.4314    1.0606    0.0000 C   0  0  0  0  0  0  0  0  0  0  0  0
   -1.7103    1.4612    0.0000 C   0  0  0  0  0  0  0  0  0  0  0  0
   -1.0027    1.0370    0.0000 C   0  0  0  0  0  0  0  0  0  0  0  0
   -1.0163    0.2121    0.0000 C   0  0  0  0  0  0  0  0  0  0  0  0
   -0.2951    0.6128    0.0000 H   0  0  0  0  0  0  0  0  0  0  0  0
   -1.7375   -0.1885    0.0000 C   0  0  0  0  0  0  0  0  0  0  0  0
   -1.7511   -1.0134    0.0000 C   0  0  0  0  0  0  0  0  0  0  0  0
   -1.0435   -1.4377    0.0000 C   0  0  0  0  0  0  0  0  0  0  0  0
   -0.3223   -1.0370    0.0000 C   0  0  0  0  0  0  0  0  0  0  0  0
    0.3852   -1.4612    0.0000 C   0  0  0  0  0  0  0  0  0  0  0  0
   -0.3087   -0.2121    0.0000 C   0  0  0  0  0  0  0  0  0  0  0  0
    0.4124    0.1885    0.0000 C   0  0  0  0  0  0  0  0  0  0  0  0
    1.1200   -0.2357    0.0000 C   0  0  0  0  0  0  0  0  0  0  0  0
    1.8412    0.1650    0.0000 C   0  0  0  0  0  0  0  0  0  0  0  0
    2.2654    0.8725    0.0000 C   0  0  0  0  0  0  0  0  0  0  0  0
    1.4405    0.8861    0.0000 O   0  0  0  0  0  0  0  0  0  0  0  0
    2.5488   -0.2593    0.0000 C   0  0  0  0  0  0  0  0  0  0  0  0
    3.2699    0.1414    0.0000 C   0  0  0  0  0  0  0  0  0  0  0  0
    0.3988   -0.6363    0.0000 C   0  0  0  0  0  0  0  0  0  0  0  0
  1  2  1  0      
  2  3  1  0      
  2  4  1  0      
  4  5  1  0      
  5  6  1  0      
  6  7  1  0      
  7  8  1  6      
  7  9  1  0      
  2  9  1  0      
  9 10  2  0      
 10 11  1  0      
 11 12  1  0      
 12 13  1  1      
 12 14  1  0      
  7 14  1  0      
 14 15  1  0      
 15 16  1  0      
 16 17  1  0      
 17 18  1  0      
 17 19  1  0      
 17 20  1  0      
 20 21  2  0      
 14 22  1  1      
M  END
